# Supplementary material
Source: PubMed Central journal article supplement (PMC5560866)
Supplement: NIHMS888492-supplement-Supplemental_Digital_Content.pdf [file NIHMS888492-supplement-Supplemental_Digital_Content.pdf]

eTable 1. Associations of Maternal Prenatal Smoking and Childhood Secondhand Smoke Exposure with Pubertal Onset<sup>a</sup>, Stratified by Race/ethnicity; adjusted<sup>b</sup> time ratios (aTRs) with 95% confidence intervals (CI)

| Child Race/ethnicity          | Breast Development | Pubic Hair Development |
|-------------------------------|--------------------|------------------------|
|                               | aTR (95% CI)       | aTR (95% CI)           |
| <b>Black</b>                  |                    |                        |
| Prenatal Smoking              |                    |                        |
| ≥5 cigs/day                   | 1.12 (1.02-1.22)   | 0.95 (0.85-1.07)       |
| <5 cigs/day                   | 1.02 (0.95-1.08)   | 0.99 (0.92-1.07)       |
| Secondhand Smoke <sup>c</sup> |                    |                        |
| High                          | 1.02 (0.97-1.08)   | 0.94 (0.88-1.01)       |
| Low/Moderate                  | 0.99 (0.95-1.02)   | 0.99 (0.94-1.03)       |
| <b>Hispanic</b>               |                    |                        |
| Prenatal Smoking              |                    |                        |
| <5 cigs/day                   | 0.87 (0.72-1.05)   | 0.78 (0.66-0.93)       |
| <5 cigs/day                   | 1.03 (0.95-1.14)   | 0.94 (0.86-1.03)       |
| Secondhand Smoke <sup>c</sup> |                    |                        |
| High                          | 1.01 (0.93-1.08)   | 0.96 (0.89-1.03)       |
| Low/Moderate                  | 1.02 (0.99-1.06)   | 1.00 (0.97-1.04)       |
| <b>Asian</b>                  |                    |                        |
| Prenatal Smoking              |                    |                        |
| ≥5 cigs/day                   | N/A                | N/A                    |
| <5 cigs/day                   | 0.91 (0.75-1.10)   | 0.96 (0.76-1.20)       |

Secondhand Smoke<sup>c</sup>

|              |                  |                  |
|--------------|------------------|------------------|
| High         | N/A              | N/A              |
| Low/Moderate | 1.06 (0.96-1.17) | 1.00 (0.89-1.13) |

**White**

Prenatal Smoking

|             |                  |                  |
|-------------|------------------|------------------|
| ≥5 cigs/day | 0.92 (0.84-1.00) | 0.95 (0.86-1.03) |
| <5 cigs/day | 1.00 (0.93-1.07) | 1.02 (0.95-1.10) |

Secondhand Smoke<sup>c</sup>

|              |                  |                  |
|--------------|------------------|------------------|
| High         | 0.91 (0.85-0.96) | 0.91 (0.85-0.97) |
| Low/Moderate | 1.00 (0.97-1.04) | 0.99 (0.96-1.03) |

---

<sup>a</sup> Pubertal onset defined (separately) as breast or pubic hair development at Tanner stage 2 or higher (B2+ or PH2+).

<sup>b</sup> Adjusted models include: study site, household income, primary caregiver's education, maternal age at delivery, child BMI (baseline), and birth weight.

<sup>c</sup> Secondhand smoke categories determined from combination of number of cigarettes smoked in the home and hours exposed away from home. No exposure reflects no regular household smokers in the home or exposure outside (>1 hour/week), High is defined as >35 cigarettes smoked per week in home or > 5 hours/week secondhand smoke exposure outside the home and at least one regular smoker at home, and Low/Moderate includes everyone else with at least some exposure at home or away.

eTable 2. Associations of Maternal Prenatal Smoking and Childhood Secondhand Smoke Exposure with Pubertal Onset <sup>a</sup>, Stratified by Child BMI categories; adjusted<sup>b</sup> time ratios (aTRs) with 95% confidence intervals (CI)

| Smoke Exposure                       | High BMI ( $\geq 85\%$ )     |                                  | Low/Moderate BMI ( $< 85\%$ ) |                                  |
|--------------------------------------|------------------------------|----------------------------------|-------------------------------|----------------------------------|
|                                      | Breast Onset<br>aTR (95% CI) | Pubic Hair Onset<br>aTR (95% CI) | Breast Onset<br>aTR (95% CI)  | Pubic Hair Onset<br>aTR (95% CI) |
| <b>Maternal Prenatal Smoking</b>     |                              |                                  |                               |                                  |
| $\geq 5$ cigs/day                    | 1.07 (0.98-1.17)             | 0.90 (0.82-0.99)                 | 0.98 (0.91-1.05)              | 0.94 (0.87-1.02)                 |
| $< 5$ cigs/day                       | 1.03 (0.96-1.11)             | 0.97 (0.90-1.04)                 | 1.00 (0.95-1.05)              | 1.00 (0.95-1.05)                 |
| <b>Secondhand Smoke <sup>c</sup></b> |                              |                                  |                               |                                  |
| High                                 | 0.97 (0.91-1.03)             | 0.92 (0.87-0.98)                 | 1.03 (0.98-1.07)              | 0.96 (0.91-1.00)                 |
| Low/Moderate                         | 0.98 (0.95-1.02)             | 0.98 (0.95-1.02)                 | 1.02 (0.99-1.04)              | 1.00 (0.97-1.03)                 |

<sup>a</sup> Pubertal onset defined (separately) as breast or pubic hair development at Tanner stage 2 or higher (B2+ or PH2+).

<sup>b</sup> Adjusted model includes: child study race, site, household income, primary caregiver's education, maternal age at delivery, girl's birth weight.

<sup>c</sup> Secondhand smoke categories determined from combination of number of cigarettes smoked in the home and hours exposed away from home. No exposure reflects no regular household smokers in the home or exposure outside ( $> 1$  hour/week), High is defined as  $> 35$  cigarettes smoked per week in home or  $> 5$  hours/week secondhand smoke exposure outside the home and at least one regular smoker at home, and Low/Moderate includes everyone else with at least some exposure at home or away.

eTable 3. Associations of Maternal Prenatal Smoking and Childhood Secondhand Smoke Exposure with Pubertal Onset<sup>a</sup>, Stratified by Birthweight; adjusted<sup>b</sup> time ratios (aTRs) with 95% confidence intervals (CI)

| Smoke Exposure                      | Low Birthweight (<5.5lbs)    |                                  | High Birthweight (>9.0lbs)   |                                  | Mid Birthweight (5.5-9.0lbs) |                                  |
|-------------------------------------|------------------------------|----------------------------------|------------------------------|----------------------------------|------------------------------|----------------------------------|
|                                     | Breast Onset<br>aTR (95% CI) | Pubic Hair Onset<br>aTR (95% CI) | Breast Onset<br>aTR (95% CI) | Pubic Hair Onset<br>aTR (95% CI) | Breast Onset<br>aTR (95% CI) | Pubic Hair Onset<br>aTR (95% CI) |
| <b>Maternal Prenatal Smoking</b>    |                              |                                  |                              |                                  |                              |                                  |
| ≥5 cigs/day                         | 1.10 (0.93-1.31)             | 1.11 (0.91-1.35)                 | 0.89 (0.67-1.20)             | 0.84 (0.68-1.05)                 | 1.00 (0.94-1.06)             | 0.91 (0.85-0.97)                 |
| <5 cigs/day                         | 1.09 (0.99-1.21)             | 1.07 (0.98-1.18)                 | 1.01 (0.84-1.21)             | 1.04 (0.84-1.30)                 | 0.99 (0.95-1.03)             | 0.96 (0.91-1.00)                 |
| <b>Secondhand Smoke<sup>c</sup></b> |                              |                                  |                              |                                  |                              |                                  |
| High                                | 1.11 (0.99-1.25)             | 1.11 (0.98-1.26)                 | 0.96 (0.84-1.09)             | 0.99 (0.84-1.17)                 | 0.98 (0.94-1.02)             | 0.92 (0.88-0.96)                 |
| Low/Moderate                        | 0.96 (0.90-1.03)             | 1.02 (0.95-1.10)                 | 0.88 (0.82-0.95)             | 0.97 (0.90-1.05)                 | 1.01 (0.99-1.03)             | 0.99 (0.97-1.02)                 |

<sup>a</sup> Pubertal onset defined (separately) as breast or pubic hair development at Tanner stage 2 or higher (B2+ or PH2+).

<sup>b</sup> Adjusted model includes: child race, study site, household income, primary caregiver's education, maternal age at delivery, child BMI (baseline).

<sup>c</sup> Secondhand smoke categories determined from combination of number of cigarettes smoked in the home and hours exposed away from home. No exposure reflects no regular household smokers in the home or exposure outside (>1 hour/week), High is defined as >35 cigarettes smoked per week in home or > 5 hours/week secondhand smoke exposure outside the home and at least one regular smoker at home, and Low/Moderate includes everyone else with at least some exposure at home or away.

eTable 4. Urinary Cotinine Concentrations at Baseline by Characteristics of Girls in BCERP<sup>a</sup>

|                                  | N    | Cotinine levels at baseline<br>(creatinine-adjusted, ug/g) |
|----------------------------------|------|------------------------------------------------------------|
|                                  |      | Geometric mean (95% CI)                                    |
| <b>Study Site</b>                |      |                                                            |
| New York                         | 378  | 1.82 (1.57-2.12)                                           |
| Ohio                             | 337  | 1.14 (0.96-1.36)                                           |
| California                       | 415  | 0.34 (0.30-0.38)                                           |
| <b>Annual household income</b>   |      |                                                            |
| <\$50,000                        | 537  | 1.70 (1.49-1.95)                                           |
| ≥\$50 - <100,000                 | 317  | 0.63 (0.53-0.74)                                           |
| ≥\$100,000                       | 276  | 0.32 (0.28-0.37)                                           |
| <b>Maternal education</b>        |      |                                                            |
| High School or less              | 321  | 1.45 (1.22-1.73)                                           |
| Some College                     | 344  | 1.29 (1.08-1.54)                                           |
| College grad or higher           | 457  | 0.42 (0.38-0.48)                                           |
| <b>Maternal age at delivery</b>  |      |                                                            |
| <25years                         | 306  | 1.92 (1.62-2.29)                                           |
| 25-35years                       | 520  | 0.72 (0.63-0.82)                                           |
| >35years                         | 267  | 0.42 (0.36-0.50)                                           |
| <b>Maternal prenatal smoking</b> |      |                                                            |
| None                             | 1036 | 0.71 (0.65-0.78)                                           |
| <5 cigarettes /day               | 64   | 4.52 (2.90-7.06)                                           |
| ≥5 cigarettes /day               | 30   | 12.23 (7.30-20.47)                                         |
| <b>Child race</b>                |      |                                                            |
| Black                            | 358  | 1.66 (1.38-1.99)                                           |
| Hispanic                         | 328  | 0.91 (0.78-1.06)                                           |
| Asian                            | 55   | 0.33 (0.24-0.45)                                           |

|                                            |     |                     |
|--------------------------------------------|-----|---------------------|
| White                                      | 389 | 0.51 (0.44-0.59)    |
| Child BMI (baseline)                       |     |                     |
| <85 <sup>th</sup> %ile CDC                 | 759 | 0.78 (0.70-0.88)    |
| ≥85 <sup>th</sup> %ile CDC                 | 371 | 1.02 (0.87-1.21)    |
| Birth weight                               |     |                     |
| Low (<5.5lbs)                              | 105 | 1.10 (0.77-1.56)    |
| Mid (5.5-9.0lbs)                           | 900 | 0.83 (0.75-0.93)    |
| High (>9.0lbs)                             | 73  | 0.60 (0.42-0.86)    |
| Total weekly cigarettes smoked in the home |     |                     |
| None (no smokers in the home)              | 826 | 0.49 (0.45-0.53)    |
| None (smokers in the home)                 | 162 | 2.04 (1.64-2.54)    |
| 1-35 cigarettes/week                       | 71  | 4.56 (3.21-6.48)    |
| >35 cigarettes/week                        | 70  | 14.94 (11.10-20.11) |
| Childhood secondhand smoke <sup>b</sup>    |     |                     |
| None                                       | 700 | 0.41 (0.38-0.45)    |
| Low/Moderate                               | 344 | 1.96 (1.68-2.30)    |
| High                                       | 85  | 12.51 (9.41-16.63)  |

<sup>a</sup> Girls with all smoke exposure variables (self-report and cotinine concentrations) non-missing, N=1129.

<sup>b</sup> Secondhand smoke categories determined from combination of number of cigarettes smoked in the home and hours exposed away from home. No exposure reflects no regular household smokers in the home or exposure outside (>1hr/week), High is defined as >35 cigarettes smoked per week in home or > 5 hours/week secondhand smoke exposure outside the home and at least one regular smoker at home, and Low/Moderate includes everyone else with at least some exposure at home or away.

BMI indicates body mass index; CDC, Centers for Disease Control and Prevention growth charts used to define overweight as BMI ≥ 85<sup>th</sup> percentile; BCERP, Breast Cancer and the Environment Research Program.
